# Supplementary material for: Clinical impact of lenvatinib in patients with unresectable hepatocellular carcinoma who received sorafenib
Source: PeerJ. 2020 Nov 13;8:e10382. doi: 10.7717/peerj.10382 (PMC7668202; doi:10.7717/peerj.10382)
Supplement: Supplemental Information 1 [file peerj-08-10382-s001.xlsx]

## Sheet: Lenvatinib all
No.	BW before Lenvatinib (kg)	Age	Gender (1:male;0:female)	ECOG	HBV (1:positive;0:negative)	HCV (1:positive;0:negative)	Child-Pugh stage (A: stage A;B: stage B)	Macrovascular invasion-before Lenva (1:yes;0:no)	OP before Lenva (1:yes;0:no)	Extrahepatic spread (1:yes;0:no)	AFP > 400 (1:yes;0:no)	Best Response to Sorafenib (PR:partial response/SD:stable disease/PD:progressive disease)	Response to Lenvatinib (PR:partial response/SD:stable disease/PD:progressive disease)	Lenvatinib Tx lines	PFS (Months)	OS (Months)	Ongoing Lenvatinib (1:yes;0:no)	Death status (1:died;0:survival)
1	74.1	51	1	1	1	0	A	0	1	1	1	SD	SD	4	5.3	13.1	0	1
2	77	56	1	1	1	0	A	0	0	1	0	PR	PR	3	8.5	12	0	1
3	67	39	1	0	1	0	A	0	1	1	0	PR	PR	2	8.2	16.4	0	1
4	69.8	61	1	1	1	0	A	1	1	1	1	SD	SD	2	4.6	5.6	0	1
5	109.5	59	1	1	1	0	B	1	1	0	0	PD	PD	2	2.2	3.5	0	1
6	81.9	56	1	1	1	0	A	1	1	1	1	SD	SD	4	3.2	8	0	1
8	65.7	37	1	1	1	0	A	1	1	1	0	SD	SD	3	26	26	1	0
10	64.1	67	1	1	1	0	A	0	1	1	0	PD	PD	2	0.7	6.2	0	1
11	74.6	67	1	1	1	0	A	1	0	1	1	PD	PD	4	2.6	12	0	1
13	76.8	57	1	1	0	1	A	0	1	0	0	PR	CR	2	9.5	22.1	0	0
16	65.1	34	1	1	1	0	A	1	1	0	0	SD	SD	3	4.2	9.4	0	0
20	81.4	37	1	0	1	0	A	0	1	1	1	PD	PD	3	1.6	3.7	0	1
23	66.6	54	1	1	1	0	A	1	1	1	0	SD	SD	4	3.3	6.2	0	1
24	57	78	1	1	0	0	A	0	1	1	0	PR	PR	3	5.6	7.7	0	1
25	54.3	64	1	1	1	0	A	0	0	0	0	SD	SD	2	5.9	6.7	0	1
26	60.1	78	1	1	0	0	A	0	0	1	1	PD	PD	2	1.3	2.2	0	1
27	65.3	62	0	1	0	1	B	1	0	1	1	PD	PD	4	2.9	3.3	0	1
31	70.8	42	1	1	1	0	B	1	0	1	1	PD	PD	2	0.5	8.1	0	1
35	57.6	57	1	1	0	1	B	1	0	1	1	PD	PD	2	1.1	1.1	0	1
36	54.9	45	1	1	1	0	B	1	0	1	1	SD	SD	3	2.9	6.7	0	1
37	78.2	62	1	1	1	0	A	0	1	1	0	SD	SD	3	3.7	9.8	0	1
38	63.4	65	1	1	1	0	A	0	1	1	1	PD	PD	3	2.3	11.5	0	1
39	46.2	35	1	1	1	0	A	0	1	1	1	PD	PR	2	2.1	3.8	0	1
40	65	73	1	1	0	1	B	0	1	0	0	SD	SD	2	7.1	16.8	0	0
43	64.9	58	1	1	1	0	B	1	1	1	0	PD	PD	4	3.1	15.7	0	0
44	64	68	1	1	1	0	A	1	0	1	1	PD	PD	2	0.7	4.7	0	1
45	44.8	48	0	1	1	0	A	1	0	0	1	PD	PD	2	2.7	3.5	0	1
46	76.2	38	1	0	1	0	A	0	1	1	0	SD	SD	4	0.4	14.2	0	0
56	64	78	0	1	1	0	A	1	0	1	0	PR	PR	2	2.7	8.4	0	1
58	51	63	0	1	0	1	A	0	1	1	0	SD	SD	2	3.1	17.8	0	0
62	73	55	1	1	1	0	A	1	0	1	0	SD	SD	2	4.8	11.3	0	0
63	49	70	1	1	0	0	A	1	0	1	1	SD	SD	2	8.3	11.5	0	0
64	68.1	65	1	0	0	0	A	0	1	1	0	SD	SD	2	3.5	10.2	0	0
65	75.5	58	1	1	0	1	A	1	0	0	0	PR	PR	2	6.7	16	0	0
67	68.3	53	1	1	1	0	A	0	0	1	1	SD	SD	4	5.7	6.1	0	1
68	75.7	61	1	1	1	0	A	0	1	1	0	SD	PR	3	3.4	25.6	0	0
69	54.6	60	1	1	1	0	B	1	0	0	0	SD	PR	2	4.6	15.1	0	0
71	70.2	50	1	0	1	0	B	0	1	1	0	SD	PR	4	6	9.7	0	0?
74	57.6	39	1	0	1	0	A	0	1	1	0	PD	PD	4	2.7	2.7	0	0
75	71.4	66	0	1	0	1	A	0	1	1	1	SD	PR	3	2.7	2.7	1	0
